# Supplementary material
Source: PubMed Central journal article supplement (PMC3346602)
Supplement: supp_56.5.2743_AAC6227-11_ST1.pdf [file supp_56.5.2743_AAC6227-11_ST1.pdf]

**Supplemental Table 1.** SNP differences between the *in vitro* selected LZD resistant mutant (9679/00 1.1.2) and the reference sequence H37Rv.

| Position | Reference | SNP | Frequency | Count | Coverage | Substitution | Annotation                                         |
|----------|-----------|-----|-----------|-------|----------|--------------|----------------------------------------------------|
| 55553    | C         | T   | 100       | 34    | 34       | Pro -> Ser   | Gene: ponA1.<br>CDS: ponA1*                        |
| 234477   | T         | G   | 100       | 8     | 8        | Tyr -> Stp   | Gene: Rv0197.<br>CDS:<br>oxidoreductase*           |
| 333892   | G         | C   | 100       | 6     | 6        | Arg -> Gly   | Gene:<br>PE_PGRS3.<br>CDS: PE_PGRS3                |
| 338100   | T         | C   | 100       | 12    | 12       | Asn -> Ser   | Gene:<br>PE_PGRS4.<br>CDS: PE_PGRS4                |
| 467516   | G         | C   | 100       | 15    | 15       |              | Gene: PPE9.<br>CDS: PPE9                           |
| 623472   | A         | G   | 100       | 7     | 7        | Asp -> Gly   | Gene:<br>PE_PGRS6.<br>CDS: PE_PGRS6                |
| 635633   | C         | T   | 100       | 116   | 116      |              | Gene: Rv0543c.<br>CDS:<br>hypothetical<br>protein* |
| 801268   | T         | C   | 100       | 69    | 69       | Cys -> Arg   | Gene: rplC. CDS:<br>rplC                           |
| 836272   | A         | G   | 100       | 14    | 14       | Glu -> Gly   | Gene:<br>PE_PGRS9.<br>CDS: PE_PGRS9                |
| 836291   | A         | G   | 100       | 11    | 11       |              | Gene:<br>PE_PGRS9.<br>CDS: PE_PGRS9                |
| 836454   | A         | G   | 100       | 18    | 18       | Thr -> Ala   | Gene:<br>PE_PGRS9.<br>CDS: PE_PGRS9                |
| 836538   | A         | G   | 100       | 14    | 14       | Asn -> Asp   | Gene:<br>PE_PGRS9.<br>CDS: PE_PGRS9                |
| 838990   | C         | G   | 100       | 4     | 4        |              | Gene:<br>PE_PGRS10.<br>CDS:<br>PE_PGRS10           |
| 839334   | A         | G   | 100       | 7     | 7        | Lys -> Arg   | Gene:<br>PE_PGRS10.<br>CDS:<br>PE_PGRS10           |
| 839348   | A         | G   | 100       | 4     | 4        | Ser -> Gly   | Gene:<br>PE_PGRS10.<br>CDS:<br>PE_PGRS10           |
| 840496   | C         | G   | 100       | 6     | 6        |              | Gene:<br>PE_PGRS10.<br>CDS:<br>PE_PGRS10           |

|         |   |   |     |     |     |            |                                                    |
|---------|---|---|-----|-----|-----|------------|----------------------------------------------------|
| 958922  | C | A | 100 | 119 | 119 |            | Gene: ercc3.<br>CDS: ercc3*                        |
| 1244700 | G | C | 100 | 107 | 107 | Val -> Leu | Gene: zwf1.<br>CDS: zwf1*                          |
| 1313338 | A | C | 100 | 37  | 37  |            | n.n.                                               |
| 1711627 | C | T | 100 | 119 | 119 |            | Gene: Rv1520.<br>CDS: sugar<br>transferase*        |
| 1823438 | C | T | 100 | 108 | 108 | Trp -> Stp | Gene: cydB.<br>CDS: cydB*                          |
| 2006032 | A | G | 98  | 130 | 132 | Gln -> Arg | Gene: Rv1771.<br>CDS:<br>oxidoreductase*           |
| 2153410 | A | G | 100 | 148 | 148 | Val -> Ala | Gene: Rv1907c.<br>CDS:<br>hypothetical<br>protein* |
| 2219929 | T | C | 100 | 53  | 53  | Leu -> Pro | Gene: Rv1977.<br>CDS:<br>hypothetical<br>protein*  |
| 2473038 | C | A | 100 | 45  | 45  |            | Gene: cobS.<br>CDS: cobS*                          |
| 3105736 | G | C | 100 | 60  | 60  | Asn -> Lys | Gene: Rv2797c.<br>CDS:<br>hypothetical<br>protein* |
| 3379718 | T | C | 100 | 12  | 12  |            | Gene: PPE47.<br>CDS: PPE47                         |
| 3379757 | A | C | 100 | 7   | 7   |            | Gene: PPE47.<br>CDS: PPE47                         |
| 3379763 | G | A | 100 | 14  | 14  |            | Gene: PPE47.<br>CDS: PPE47                         |
| 3748105 | C | G | 100 | 87  | 87  | Asp -> His | Gene: PPE55.<br>CDS: PPE55                         |

\*denotes genes that were also present in the genomes of three further H37Rv variants selected *in vitro* for resistance to other antibiotics (possible failures in the H37Rv reference sequence).
