# Supplementary material
Source: PubMed Central journal article supplement (PMC3346602)
Supplement: supp_56.5.2743_AAC6227-11_ST2.pdf [file supp_56.5.2743_AAC6227-11_ST2.pdf]

**Supplemental Table 2.** Strains of the reference collection

| Sample Name | Species             | Genotype            |
|-------------|---------------------|---------------------|
| 1449/02     | <i>M. africanum</i> | West African 1a     |
| 1473/02     | <i>M. africanum</i> | West African 1a     |
| 5434/02     | <i>M. africanum</i> | West African 1a     |
| 10473/01    | <i>M. africanum</i> | West African 1b     |
| 10494/01    | <i>M. africanum</i> | West African 1b     |
| 1443/02     | <i>M. africanum</i> | West African 1b     |
| 10514/01    | <i>M. africanum</i> | West African 2      |
| 10517/01    | <i>M. africanum</i> | West African 2      |
| 5468/02     | <i>M. africanum</i> | West African 2      |
| 9550/00     | <i>M. africanum</i> | West African 2 ATCC |
| 4258/00     | <i>M. bovis</i>     | Bovis               |
| 751/01      | <i>M. bovis</i>     | Bovis               |
| 7540/01     | <i>M. bovis</i>     | Bovis               |
| 9564/00     | <i>M. bovis</i>     | Bovis ATCC          |
| 3040/99     | <i>M. canettii</i>  | Canettii            |
| 3041/99     | <i>M. canettii</i>  | Canettii            |
| 3151/08     | <i>M. canetti</i>   | Canettii            |
| 1694/00     | <i>M. caprae</i>    | Caprae              |
| 8986/99     | <i>M. caprae</i>    | Caprae              |
| 9577/99     | <i>M. caprae</i>    | Caprae              |
| 416/01      | <i>M. microti</i>   | Llama               |
| 8753/00     | <i>M. microti</i>   | Llama               |
| 1479/99     | <i>M. microti</i>   | Vole                |

|          |                        |            |
|----------|------------------------|------------|
| 7011/02  | <i>M. pinnipedii</i>   | Seal       |
| 7739/01  | <i>M. pinnipedii</i>   | Seal       |
| 12594/02 | <i>M. tuberculosis</i> | Beijing    |
| 1500/03  | <i>M. tuberculosis</i> | Beijing    |
| 1934/03  | <i>M. tuberculosis</i> | Beijing    |
| 1417/02  | <i>M. tuberculosis</i> | Cameroon   |
| 5390/02  | <i>M. tuberculosis</i> | Cameroon   |
| 5400/02  | <i>M. tuberculosis</i> | Cameroon   |
| 2637/02  | <i>M. tuberculosis</i> | Delhi/CAS  |
| 7936/01  | <i>M. tuberculosis</i> | Delhi/CAS  |
| 9915/01  | <i>M. tuberculosis</i> | Delhi/CAS  |
| 1797/03  | <i>M. tuberculosis</i> | EAI        |
| 4850/03  | <i>M. tuberculosis</i> | EAI        |
| 947/01   | <i>M. tuberculosis</i> | EAI        |
| 10469/01 | <i>M. tuberculosis</i> | Ghana      |
| 10493/01 | <i>M. tuberculosis</i> | Ghana      |
| 2570/02  | <i>M. tuberculosis</i> | Ghana      |
| 9679/00  | <i>M. tuberculosis</i> | H37Rv ATCC |
| 2336/02  | <i>M. tuberculosis</i> | Haarlem    |
| 4130/02  | <i>M. tuberculosis</i> | Haarlem    |
| 9532/03  | <i>M. tuberculosis</i> | Haarlem    |
| 7968/03  | <i>M. tuberculosis</i> | LAM        |
| 8885/03  | <i>M. tuberculosis</i> | LAM        |
| 946/03   | <i>M. tuberculosis</i> | LAM        |
| 10459/03 | <i>M. tuberculosis</i> | New-1      |

|          |                        |           |
|----------|------------------------|-----------|
| 12591/02 | <i>M. tuberculosis</i> | New-1     |
| 8870/03  | <i>M. tuberculosis</i> | New-1     |
| 2151/03  | <i>M. tuberculosis</i> | S-type    |
| 2318/06  | <i>M. tuberculosis</i> | S-type    |
| 6411/05  | <i>M. tuberculosis</i> | S-type    |
| 11313/03 | <i>M. tuberculosis</i> | Tur       |
| 10264/03 | <i>M. tuberculosis</i> | Tur       |
| 10529/03 | <i>M. tuberculosis</i> | Tur       |
| 2169/99  | <i>M. tuberculosis</i> | Uganda I  |
| 2201/99  | <i>M. tuberculosis</i> | Uganda I  |
| 2333/99  | <i>M. tuberculosis</i> | Uganda I  |
| 2176/99  | <i>M. tuberculosis</i> | Uganda II |
| 2191/99  | <i>M. tuberculosis</i> | Uganda II |
| 2253/99  | <i>M. tuberculosis</i> | Uganda II |
| 1657/03  | <i>M. tuberculosis</i> | Ural      |
| 2679/03  | <i>M. tuberculosis</i> | Ural      |
| 8431/03  | <i>M. tuberculosis</i> | Ural      |
| 4412/04  | <i>M. tuberculosis</i> | X-type    |
| 8431/05  | <i>M. tuberculosis</i> | X-type    |
| 9953/04  | <i>M. tuberculosis</i> | X-type    |

---

CAS, Central Asian; EAI, East African Indian; LAM, Latin American Mediterranean
